# Supplementary material for: Structural Characterization and Bioactivity of a Titanium(IV) -Oxo Complex Stabilized by Mandelate Ligands
Source: Preprints.org preprint supplement (doi:10.20944/preprints202403.1145.v1), 2024-03-19
Supplement: Supplementary file 4 [file Table S1.docx]

|  | Distance [Å] |  | Angles [o] |  | Angles [o] |
| --- | --- | --- | --- | --- | --- |
| Ti1-O21 | 1.798(3) | O21-Ti1-O10 | 106.35(13) | O3-Ti2-O31i | 88.97(12) |
| Ti1-O10 | 1.867(3) | O21-Ti1-O31 | 95.00(13) | O10-Ti2-O31i | 75.77(11) |
| Ti1-O31 | 1.952(3) | O10-Ti1-O31 | 104.11(12) | O12-Ti2-O31i | 82.35(12) |
| Ti1-O1 | 2.055(3) | O21-Ti1-O1 | 93.57(13) | O81-Ti3-O71 | 93.59(19) |
| Ti1-O3 | 2.058(3) | O10-Ti1-O1 | 147.75(13) | O81-Ti3-O61 | 108.5(2) |
| Ti1-O10i | 2.074(3) | O31-Ti1-O1 | 98.98(12) | O71-Ti3-O61 | 99.92(18) |
| Ti1-Ti1i | 3.0086(13) | O21-Ti1-O3 | 92.88(13) | O81-Ti3-O13 | 171.30(16) |
| Ti1-Ti2 | 3.1036(10) | O10-Ti1-O3 | 78.25(11) | O71-Ti3-O13 | 94.42(16) |
| Ti1-Ti2i | 3.1940(10) | O31-Ti1-O3 | 170.73(13) | O61-Ti3-O13 | 73.42(15) |
| Ti2-O41 | 1.769(3) | O1-Ti1-O3 | 75.62(11) | O81-Ti3-O11 | 100.03(18) |
| Ti2-O51 | 1.807(3) | O21-Ti1-O10i | 171.33(13) | O71-Ti3-O11 | 93.70(16) |
| Ti2-O3 | 2.006(3) | O10-Ti1-O10i | 80.61(12) | O61-Ti3-O11 | 147.34(15) |
| Ti2-O10 | 2.040(3) | O31-Ti1-O10i | 78.06(12) | O13-Ti3-O11 | 76.06(13) |
| Ti2-O12 | 2.054(3) | O1-Ti1-O10i | 82.53(11) | O81-Ti3-O2i | 82.89(16) |
| Ti2-O31i | 2.091(3) | O3-Ti1-O10i | 93.64(11) | O71-Ti3-O2i | 173.50(17) |
| Ti3-O81 | 1.784(4) | O41-Ti2-O51 | 97.93(16) | O61-Ti3-O2i | 86.41(14) |
| Ti3-O71 | 1.795(4) | O41-Ti2-O3 | 95.43(15) | O13-Ti3-O2i | 88.81(13) |
| Ti3-O61 | 1.933(4) | O51-Ti2-O3 | 95.79(13) | O11-Ti3-O2i | 81.59(12) |
| Ti3-O13 | 2.038(4) | O41-Ti2-O10 | 98.47(14) | O101-Ti4-O111 | 101.9(3) |
| Ti3-O11 | 2.070(3) | O51-Ti2-O10 | 162.13(14) | O101-Ti4-O91 | 111.3(3) |
| Ti3-O2i | 2.172(3) | O3-Ti2-O10 | 75.65(11) | O111-Ti4-O91 | 100.0(3) |
| Ti3-Ti4 | 3.2486(15) | O41-Ti2-O12 | 91.80(15) | O101-Ti4-O13 | 118.1(3) |
| Ti4-O101 | 1.773(5) | O51-Ti2-O12 | 96.26(14) | O111-Ti4-O13 | 91.02(19) |
| Ti4-O111 | 1.787(5) | O3-Ti2-O12 | 164.96(12) | O91-Ti4-O13 | 125.55(19) |
| Ti4-O91 | 1.801(5) | O10-Ti2-O12 | 90.27(12) | O101-Ti4-O61 | 90.6(3) |
| Ti4-O13 | 1.979(3) | O41-Ti2-O31i | 171.70(14) | O111-Ti4-O61 | 161.70(19) |
| Ti4-O61 | 2.098(4) | O51-Ti2-O31i | 88.60(14) | O91-Ti4-O61 | 87.5(2) |
|  |  |  |  | O13-Ti4-O61 | 71.20(14) |
